# Supplementary material for: Do Ganoderma Species Represent Novel Sources of Phenolic Based Antimicrobial Agents?
Source: MDPI journal article supplement (doi:10.3390/molecules28073264), 2023-04-06
Supplement: s1 [file s1]

**Table S1.** LC-MS/MS profile of selected phenolic compounds in the examined EtOH and H<sub>2</sub>O extracts of *G. applanatum*, *G. lucidum*, *G. pfeifferi* and *G. resinaceum*<sup>a</sup>.

| Analyzed sample                       | Amount of detected compound (µg/g d.w.) |                     |                         |               |               |            |              |             |               |             |              |                  | Reference <sup>ii</sup> |
|---------------------------------------|-----------------------------------------|---------------------|-------------------------|---------------|---------------|------------|--------------|-------------|---------------|-------------|--------------|------------------|-------------------------|
|                                       | <i>p</i> -Hydroxybenzoic acid           | Protocatechuic acid | <i>p</i> -Coumaric acid | Vanillic acid | Gallonic acid | Aesculetin | Caffeic acid | Quinic acid | Syringic acid | Chrysoeriol | Isorhamnetin | Chlorogenic acid |                         |
| <i>G. applanatum</i> EtOH             | 3.82                                    | 6.40                | 0.316                   | 11.40         | 2.10          | 4.70       | 1.90         | 2.90        | 9.80          | n.d.        | n.d.         | n.d.             | [23]                    |
|                                       | 4.15                                    | 7.50                | 0.325                   | 12.10         | 2.21          | 5.15       | 2.10         | 3.05        | 9.60          | <0.10*      | <0.40*       | <0.30*           | [45]                    |
| <i>G. applanatum</i> H <sub>2</sub> O | <0.30*                                  | 1.40                | <0.20*                  | 4.50          | 0.40          | 0.90       | <0.20*       | 2.50        | 3.00          | n.d.        | n.d.         | n.d.             | [23]                    |
|                                       | <0.30*                                  | 1.60                | <0.20*                  | 4.80          | 0.50          | 1.00       | <0.20*       | 3.10        | 3.20          | <0.10*      | <0.40*       | <0.30*           | [45]                    |
| <i>G. lucidum</i> EtOH                | 8.30                                    | 22.20               | 0.50                    | 6.30          | 0.50          | 0.90       | 1.70         | 6.20        | <1.60*        | n.d.        | n.d.         | n.d.             | [23]                    |
|                                       | 9.10                                    | 23.20               | 0.70                    | 7.10          | 0.40          | 1.00       | 2.00         | 6.90        | 4.10          | <0.10*      | <0.40*       | <0.30*           | [45]                    |
| <i>G. lucidum</i> H <sub>2</sub> O    | 1.90                                    | 0.90                | <0.20*                  | <4.00*        | <0.40*        | <0.20*     | <0.20*       | 2.50        | <1.60*        | n.d.        | n.d.         | n.d.             | [23]                    |
|                                       | 2.20                                    | 1.00                | <0.20*                  | <4.00*        | <0.40*        | <0.20*     | <0.20*       | 3.00        | <1.60*        | <0.10*      | <0.40*       | <0.30*           | [45]                    |
| <i>G. pfeifferi</i> EtOH              | 23.00                                   | 6.50                | 1.50                    | 6.50          | 30.50         | n.d.       | 0.80         | 8.51        | n.d.          | n.d.        | n.d.         | 1.26             | [25]                    |
|                                       | 3.30                                    | 7.50                | 1.50                    | 7.60          | 0.50          | <0.20*     | 1.00         | 10.90       | <1.60*        | 0.10        | 0.40         | 0.30             | [45]                    |
| <i>G. pfeifferi</i> H <sub>2</sub> O  | 5.10                                    | 6.20                | 1.00                    | 4.50          | 1.50          | n.d.       | 0.80         | 6.35        | n.d.          | n.d.        | n.d.         | 0.80             | [25]                    |
|                                       | 3.00                                    | 8.90                | 0.20                    | <4.00*        | <0.40*        | <0.20*     | 0.50         | 6.60        | <1.60*        | <0.10*      | <0.40*       | 0.40             | [45]                    |

|                         |        |      |        |        |            |        |        |        |        |        |        |        |      |
|-------------------------|--------|------|--------|--------|------------|--------|--------|--------|--------|--------|--------|--------|------|
| G.<br><i>resinaceum</i> | 12.20  | 4.01 | 0.80   | <4.00* | 15.8<br>5  | n.d.   | 0.40   | 6.90   | n.d.   | n.d.   | n.d.   | <0.30* | [25] |
| EtOH                    | 2.20   | 2.00 | 0.20   | <4.00* | <0.4<br>0* | <0.20* | 0.30   | 6.90   | <1.60* | <0.10* | <0.40* | <0.30* | [45] |
| G.<br><i>resinaceum</i> | <0.30* | 2.65 | 0.60   | <4.00* | 1.20       | n.d.   | 0.25   | 3.00   | n.d.   | n.d.   | n.d.   | <0.30* | [25] |
| H <sub>2</sub> O        | <0.30* | 0.60 | <0.20* | <4.00* | <0.4<br>0* | <0.20* | <0.20* | <0.40* | <1.60* | <0.10* | <0.40* | <0.30* | [45] |

<sup>a</sup> - Table S1 represents our previously published results [23,25,45]; \* < Number: peak was observed for detected compound, but concentration is lower than the LoQ (limit of quantification), and higher than the LoD (limit of detection); EtOH, ethanolic extract; H<sub>2</sub>O, water extract; n.d. – compounds are not detected in the analysed extracts.

**Table S2.** Antibigram of analyzed bacterial strains.

| <b>Bacterial strains</b>                     | <b>Amikacin</b> | <b>Tetracycline</b> | <b>Methicillin</b> | <b>Kanamycin</b> | <b>Ceftriaxone</b> |
|----------------------------------------------|-----------------|---------------------|--------------------|------------------|--------------------|
| <i>B. cereus</i> <sup>ATCC</sup><br>11778    | 22(S)           | 24(I)               | 0(R)               | 20(R)            | 10(R)              |
| <i>E. coli</i> <sup>ATCC 11775</sup>         | 22(S)           | 25(I)               | 0(R)               | 20(R)            | 29(S)              |
| <i>E. coli</i> <sup>ATCC 11229</sup>         | 23(S)           | 22(R)               | 0(R)               | 22(R)            | 30(S)              |
| <i>E. faecalis</i> <sup>ATCC</sup><br>19433  | 0(R)            | 30(S)               | 0(R)               | 12(R)            | 16(S)              |
| <i>K. aerogenes</i> <sup>ATCC</sup><br>13048 | 21(S)           | 24(I)               | 0(R)               | 19(R)            | 25(S)              |
| <i>P. aeruginosa</i> <sup>ATCC</sup><br>3554 | 21(S)           | 12(R)               | 0(R)               | 0(R)             | 12(R)              |
| <i>S. aureus</i> <sup>ATCC</sup><br>255923   | 25(S)           | 34(S)               | 35(S)              | 25(I)            | 27(S)              |
| <i>S. aureus</i> <sup>ATCC</sup><br>6538     | 21(S)           | 31(S)               | 26(S)              | 28(S)            | 25(S)              |

S-sensitive; I-intermediate; R-resistant.

## Supplementary Data S1

### LC-MS/MS analysis of selected phenolic compounds.

The CHCl<sub>3</sub> extracts of *G. applanatum* and *G. pfeifferi* were diluted in a 1:1 premixed solution of water and methanol before analysis to achieve a final concentration of 2 mg/mL. All samples and standards were analyzed using Agilent Technologies (AT) 1200 Series high-performance liquid chromatography coupled with AT 6410A Triple Quad tandem mass spectrometer with electrospray ion source, and controlled by ATMassHunter Workstation software - Data Acquisition (ver. B.03.01). All used compounds were separated using a Zorbax Eclipse XDB-C18 (50 mm 4.6 mm, 1.8  $\mu$ m) quick resolution column maintained at 50 °C by injecting 5  $\mu$ L of the samples/standards into the apparatus. Mobile phase was provided at a flow rate of 1 mL/min in gradient mode (0 min 30% B, 6 min 70% B, 9 min 100% B, 12 min 100% B, re-equilibration time 3 min) and included phase A: 0.05% aqueous formic acid and phase B: methanol. By employing the following ion source parameters-nebulization gas (N<sub>2</sub>) pressure 50 psi, drying gas (N<sub>2</sub>) flow 10 L/min and temperature 350 °C, capillary voltage 4 kV, negative polarity—eluted chemicals were discovered by ESI-MS. Data were collected utilizing the improved compound-specific parameters in dynamic MRM mode. Agilent MassHunter Workstation software - Qualitative Analysis was used to determine peak regions for each molecule (ver. B.03.01.). The sample concentrations and calibration curves were calculated and plotted using the OriginLabs Origin Pro (version 9.0) software.
